# Supplementary material for: Remote Ischemic Preconditioning Reduces Marathon-Induced Oxidative Stress and Decreases Liver and Heart Injury Markers in the Serum
Source: Frontiers journal article supplement (doi:10.3389/fphys.2021.731889), 2021-09-06
Supplement: Table_1.pdf [file Table_1.pdf]

1 **Supplementary materials**

2 **Supplementary Table 1** | Summary of inclusion and exclusion criteria during medical examination

3

|                           |                                                                                                                                                                                                            |   |
|---------------------------|------------------------------------------------------------------------------------------------------------------------------------------------------------------------------------------------------------|---|
| <b>Inclusion criteria</b> | 1. Aged not less than 30 years and not older than 40                                                                                                                                                       | 4 |
|                           | 2. Experienced marathon runner (minimum five starts in full marathon run)                                                                                                                                  | 5 |
|                           | 3. Completion time less than 3 h 20 min                                                                                                                                                                    |   |
|                           | 4. No additional drug intake or smoking and good health status                                                                                                                                             | 6 |
|                           | 5. No additional supplementation                                                                                                                                                                           |   |
| <b>Exclusion criteria</b> | 1. Physically or mentally illness                                                                                                                                                                          | 7 |
|                           | 2. Previsions heart and liver problems                                                                                                                                                                     |   |
|                           | 3. Comorbidities causing severe inflammation: asthma, allergy, asthma, <sup>8</sup> celiac disease, psoriasis, Raynaud's disease, rheumatoid arthritis, systemic lupus erythematosus, diabetes, and other. | 9 |

10

11

12

13
